# Supplementary material
Source: Springer Nature journal article supplement (https://www.springermedizin.de/resource/supplementary/12911_2012_454_MOESM1_ESM.pdf/9525992)

Experimental counties

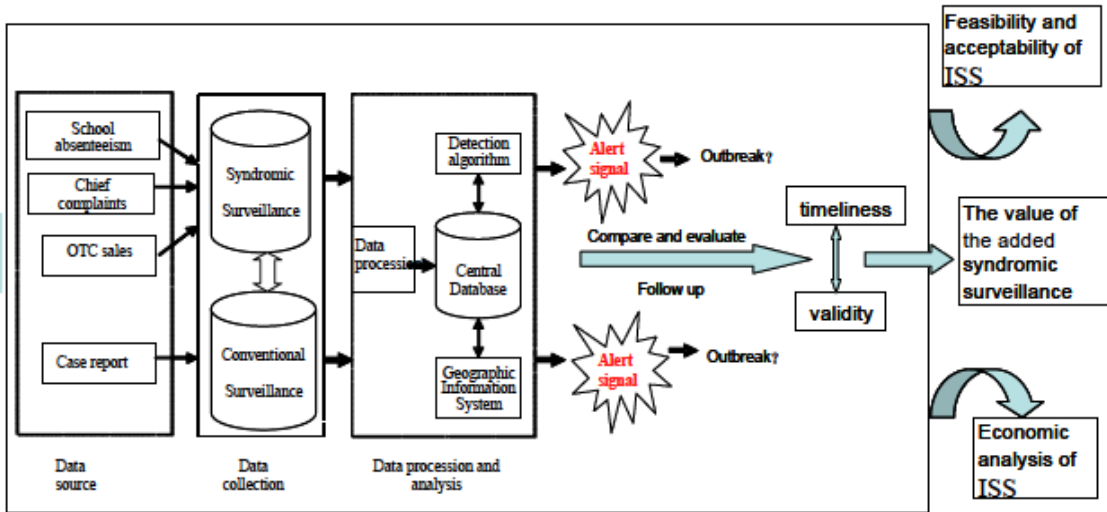

Supplement: MOESM1 [file 9525992]
